# Supplementary material
Source: PubMed Central journal article supplement (PMC4224274)

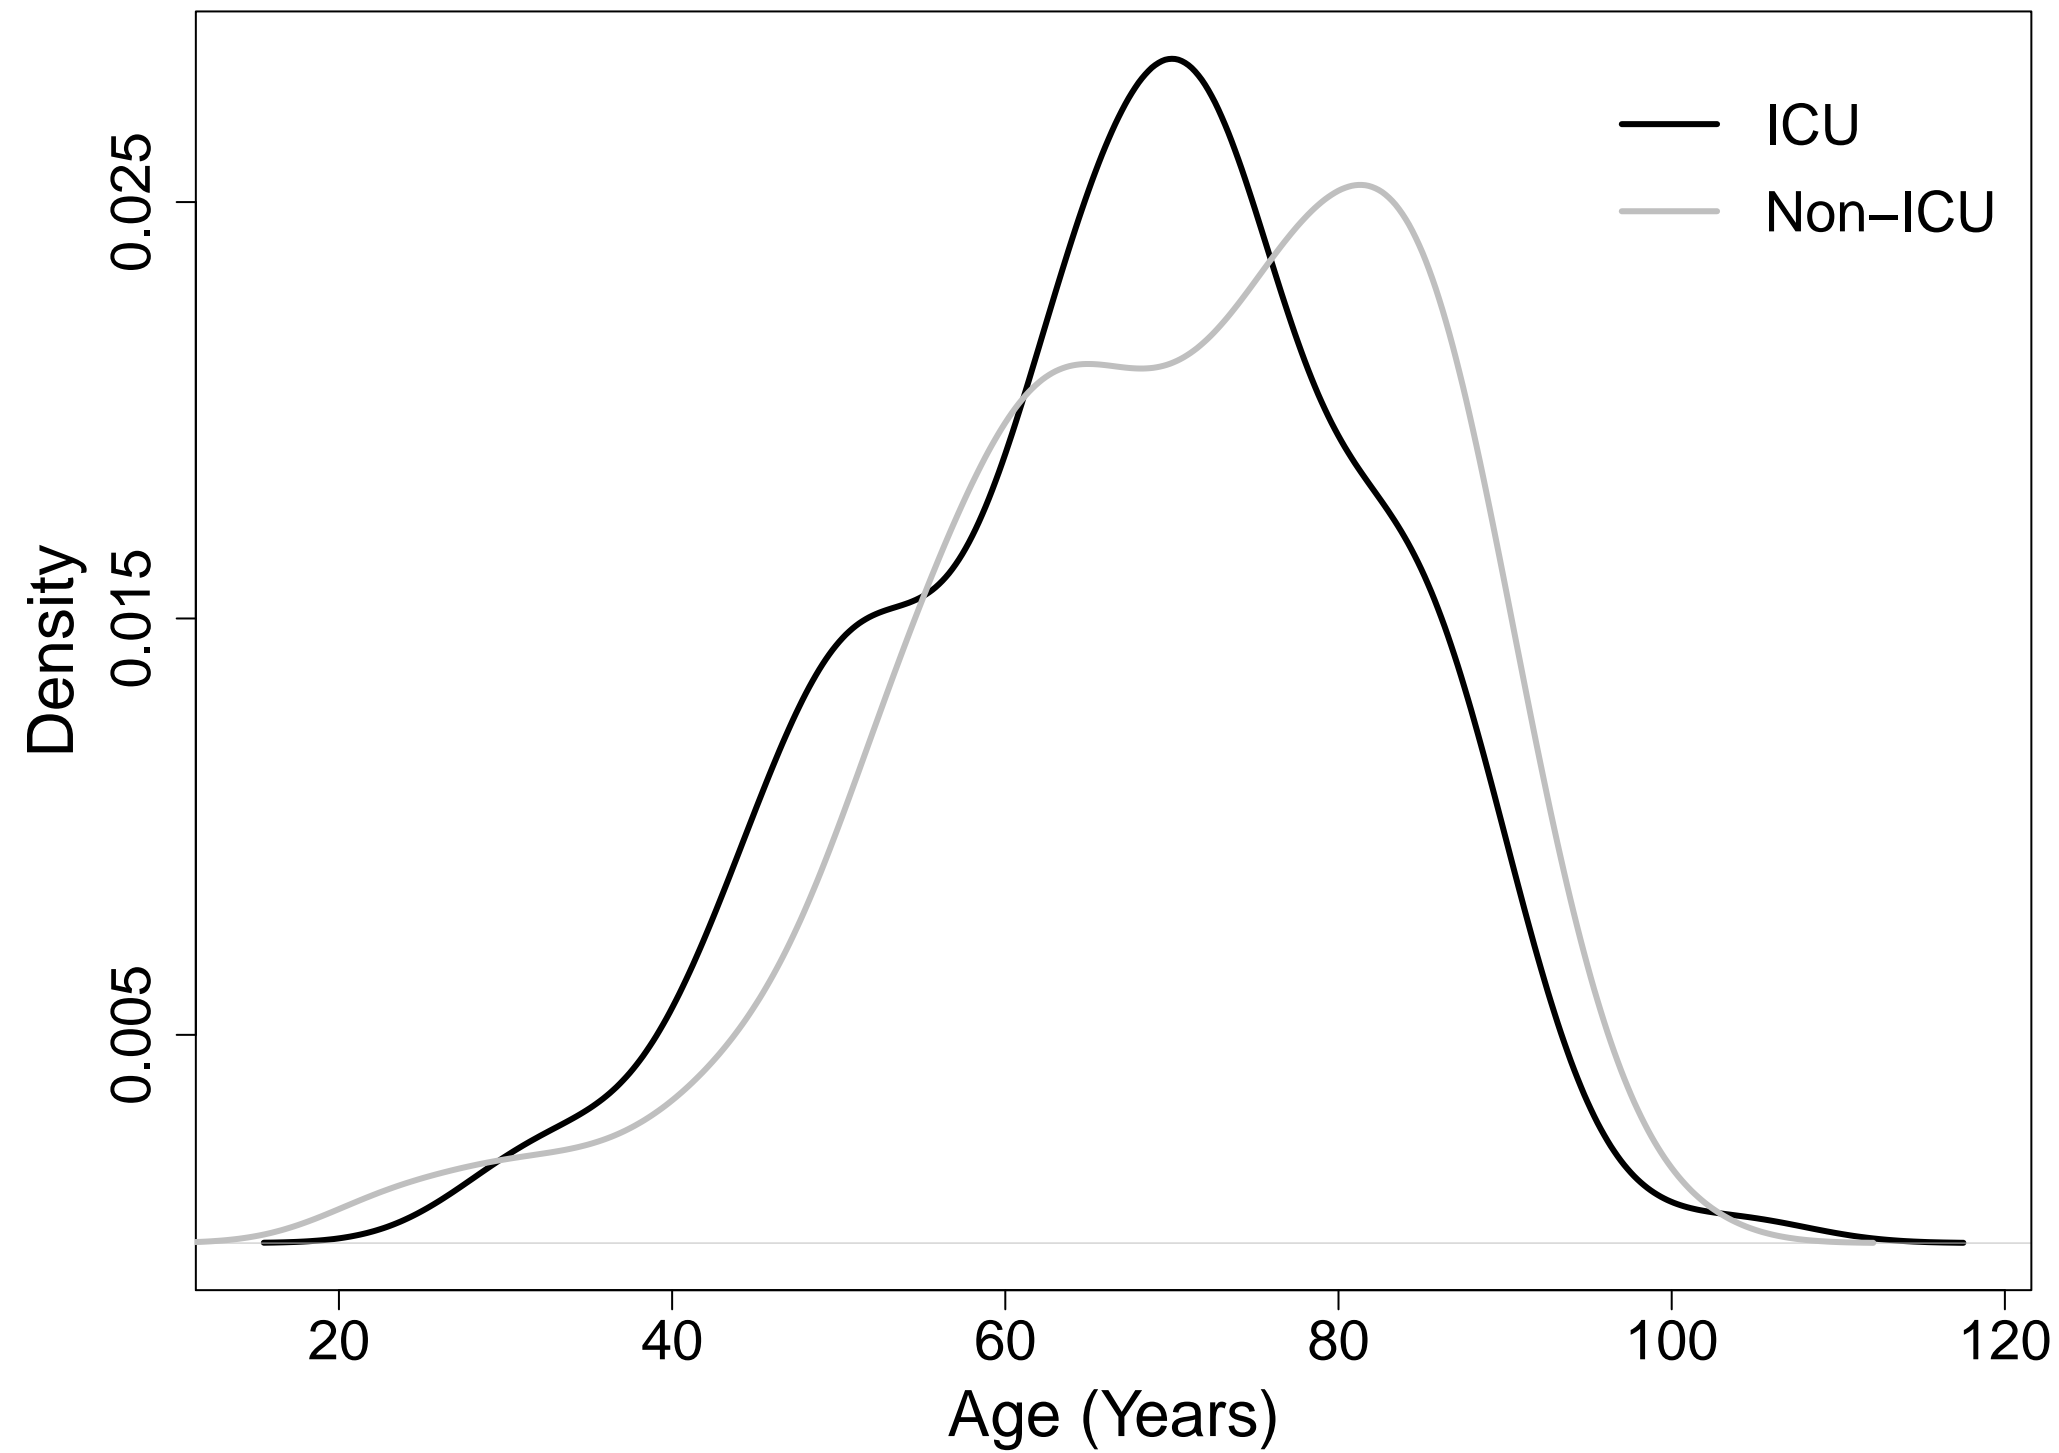

Supplement: NIHMS638953-supplement-Supplemental_Fig_1.pdf [file NIHMS638953-supplement-Supplemental_Fig_1.pdf]

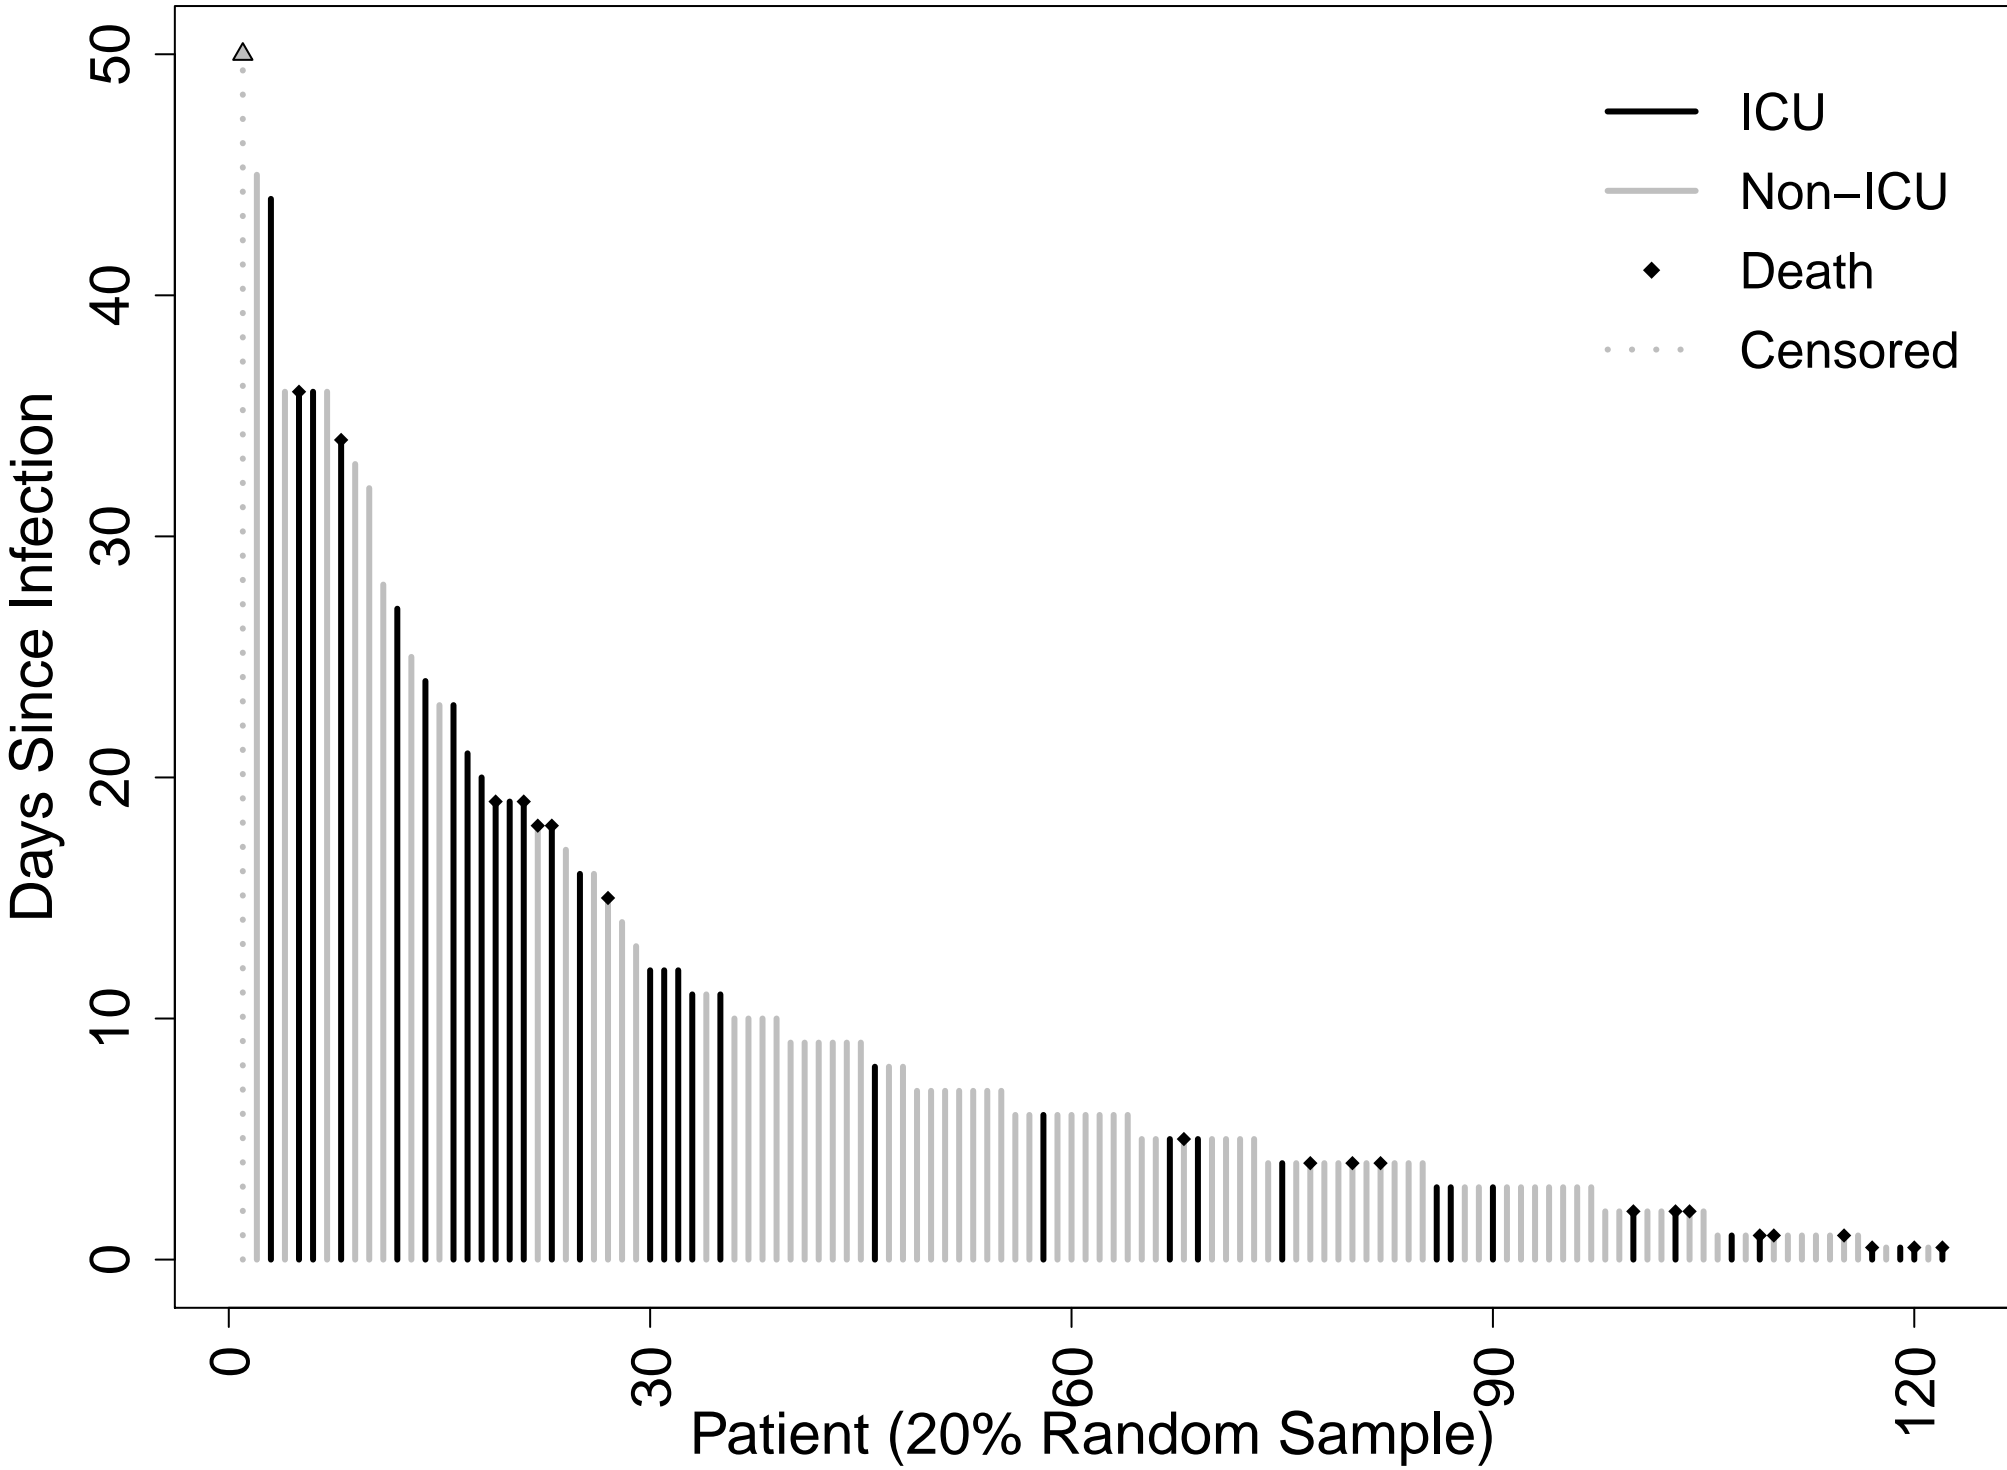

Supplement: NIHMS638953-supplement-Supplemental_Fig_2.pdf [file NIHMS638953-supplement-Supplemental_Fig_2.pdf]
